# Supplementary material for: Children’s Attentional Processes in Outdoor and Indoor Environments: The Role of Physiological Self-Regulation
Source: MDPI journal article supplement (doi:10.3390/ijerph192013141), 2022-10-12

## Supplementary Material

**Figure S1.** Study Design

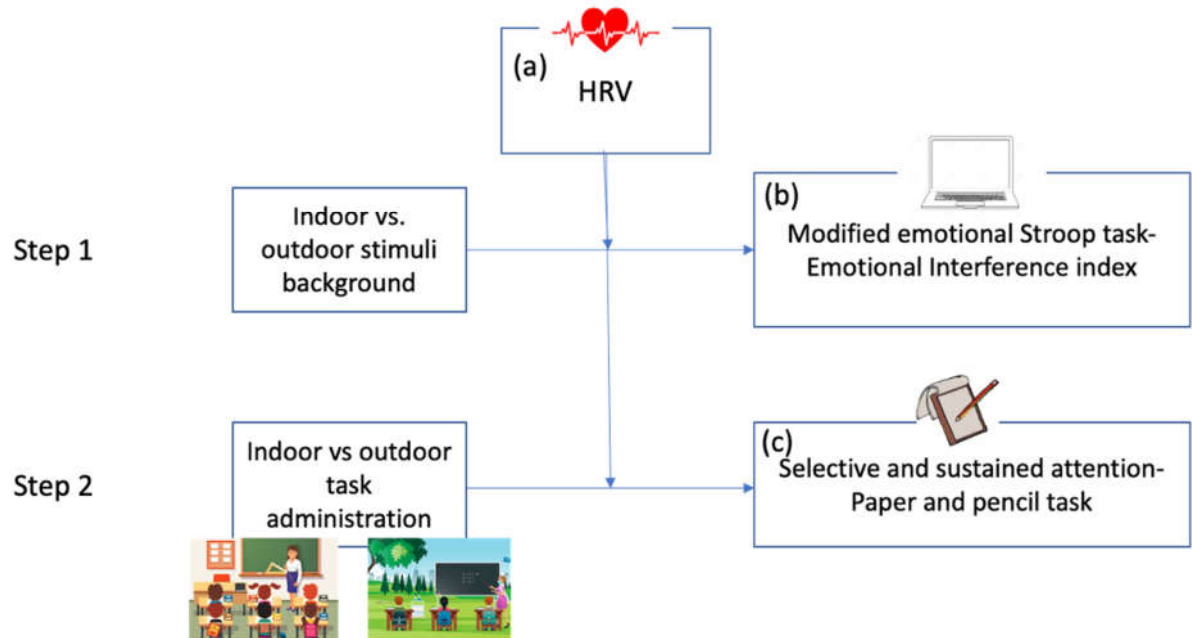

*Note.* All students were involved in both Steps 1 and 2. First, children were individually assessed to register (a) heart rate variability at rest. In the same individual session children's (b) reaction times were recorded in a modified version of the emotional Stroop task (Step 1). Last, children (c) were collectively assessed (as a class) on a paper and pencil attention task twice (inside the classroom and outside in the greenness (Step 2).

**Figure S2.** Simple Slopes for the Interaction between Environment (Outdoor vs. Classroom) and HRV on Students' Emotional Interference

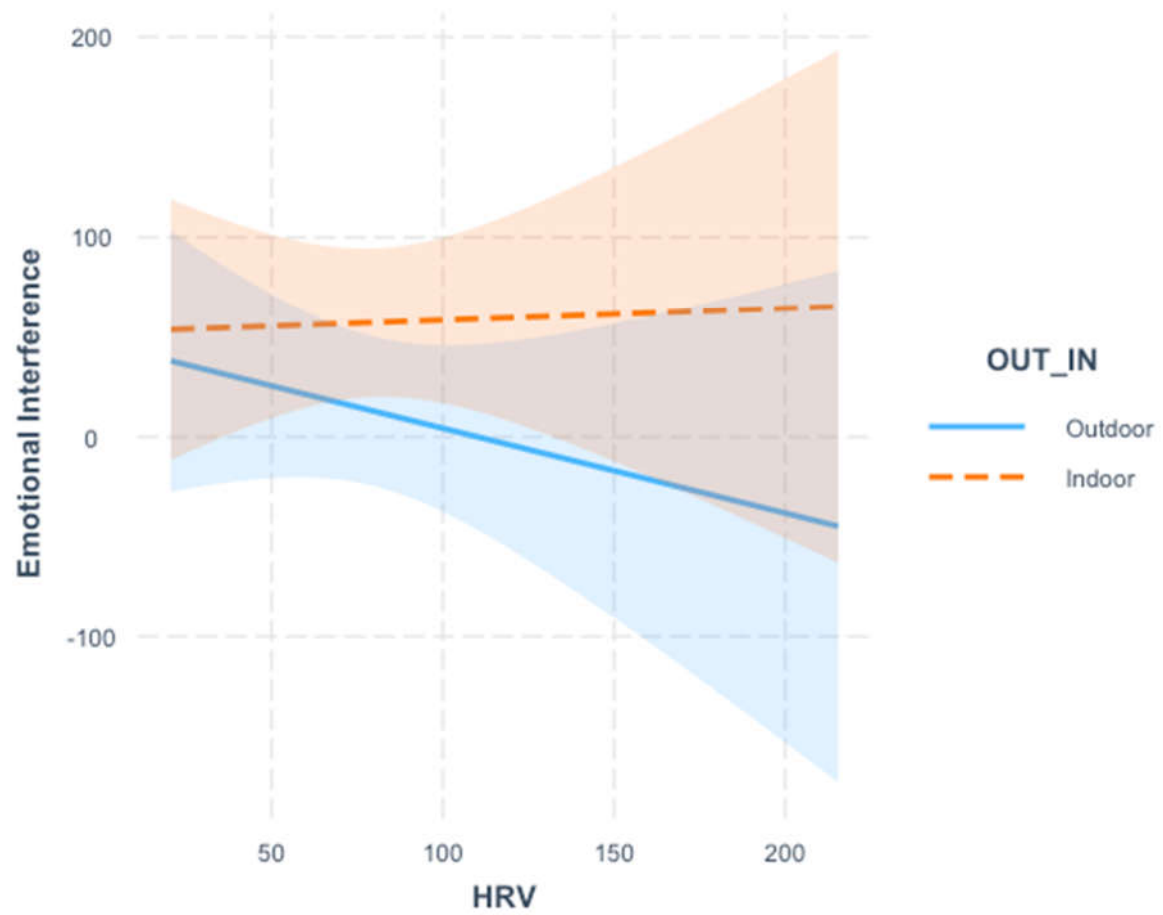

Supplement: s1 [file s1]
